# Supplementary material
Source: PubMed Central journal article supplement (PMC7415718)

## Supplemental Information:

**Figure S1, Related to Figure 1.** Generation of NDI1 knock-in mice and confirmation of NDUFS4 knock-out and NDI1 knock-in. **(A)** Schematic of the NDI1-LSL targeting construct for knock-in at the mouse *Rosa26* locus. Homologous recombination in embryonic stem cells after electroporation allows the generation of mice with the NDI1-LSL allele in their germline. Cre-mediated recombination of LoxP sites leads to deletion of the STOP cassette and expression of the yeast enzyme NADH Dehydrogenase Internal 1 (NDI1). **(B)** NDI1 protein quantification in whole brain tissue using a Wes automated capillary-based fluorescent immunoassay system. The area of fluorescent peaks detected at 58 kDa (predicted NDI1 molecular weight) divided by the area of peaks detected at 111 kDa (predicted Vinculin molecular weight) as a loading control were used to generate bar graphs of relative protein abundance of NDI1 at 7 weeks of age and at greater than 6 months of age to demonstrate that NDI1 protein remains detectable in adult brain tissue. **(C)** NDUFS4 protein quantification in whole brain tissue using a Wes automated capillary-based fluorescent immunoassay system. The area of fluorescent peaks detected at 26 kDa (predicted NDUFS4 molecular weight) divided by the area of peaks detected at 52 kDa (predicted Tubulin molecular weight) as a loading control were used to generate bar graphs of relative protein abundance of NDUFS4 at 7 weeks of age and at greater than 6 months of age to demonstrate appropriate depletion of NDUFS4 gene in adult brain tissue. **(D)** NDI1 and **(E)** NDUFS4 mRNA measured by qPCR from astrocytes and microglia were sorted from adult NDI1 expressing mice and NDUFS4 cKO mice to confirm appropriate recombination by Nestin Cre in neural lineage cells (astrocytes) but not microglia. **(F)** Sort layout and gating strategy for mRNA analysis of astrocytes and microglia. **(G)** DropViz data suggests that in the mouse cerebellum the relative NDUFS4 expression is highest in cerebellar granule neurons. Publicly available Drop-seq data on the DropViz online platform was used to query NDUFS4 expression by putative cell type cluster in the mouse cerebellum.

**Figure S2, Related to Figure 2** Characterization of persistently ataxic cKO+NDI1 muscle. **(A)** Representative Hematoxylin and Eosin (H&E) and **(B)** trichrome staining of quadriceps cross section in both NDI1 control and cKO + NDI1 ataxic mice over 1 year of age. No central nuclei or ragged-red-fibers are observed. **(C)** Quantification of relative mean fiber diameter in quadriceps muscle (N=6 per genotype, T-test not significant). **(D)** Quantification of NDUFS4 protein abundance in quadriceps muscle using a Wes automated capillary-based fluorescent immunoassay system. The area of fluorescent peaks detected at 26 kDa (predicted NDUFS4 molecular weight) divided by the area of peaks detected at 52 kDa (predicted Tubulin molecular weight) as a loading control were used to generate bar graphs of relative protein abundance of NDUFS4 at over 1 year of age (N=6 per genotype, T-test not significant). **(E-G)** Soluble metabolite measurements of quadriceps muscles at over 1 year of age. **(E)** Multiple T-tests with multiple hypothesis adjustment to 0.1 resulted in no discoveries of significantly different metabolite levels (N=6 per genotype). **(F)** Principal component analysis scores plot of muscle metabolite profile. **(G)** Heatmap of top 25 candidate metabolites ranked by T-test P-value Z-scores calculated by row.

**Figure S3, Related to Figure 3.** Representative histology images demonstrate microglial and astrocyte activation in the brain stem, olfactory bulb, and cerebellum, and representative whole-body plethysmography tracings. **(A)** Representative whole-body plethysmography breathing patterns of cKO+NDI1 (left) and cKO (right) mice at over 7 weeks of age with times of regular and irregular breathing patterns in both groups. No apneas were observed in either group. **(B)** DAB staining of IBA1 for microglial abundance and morphology as an indicator of neuroinflammation. 63x representative images of mouse olfactory bulb, brainstem, and cerebellum cut in horizontal section. **(C)** DAB staining of GFAP for astrocyte abundance and activation morphology as an indicator of neuroinflammation. 40x representative images of mouse olfactory bulb, brainstem, and cerebellum cut in horizontal section.

**Figure S4, related to Figure 4.** Metabolic characterization of primary glia and RNA-seq data. **(A)** Uniformly labeled  $^{13}\text{C}$ -glucose metabolite tracing in cultured astrocyte-enriched primary cells from early post-natal mice for 6 hours. The percentage of the total pool was calculated for each condition (N=3-7 per group, \* indicates significant two-way-ANOVA  $P < 0.05$  with Tukey's multiple comparisons test vs WT adjusted  $P < 0.05$  for M+0 peak, ANOVAs calculated independently for each metabolite). **(B)** Mitochondrial complex I-dependent ADP stimulated respiration in permeabilized astrocyte-enriched primary brain cultures. Cells were permeabilized and provided the complex I substrates pyruvate and malate. (N=3-7 per group, ANOVA not significant). **(C)** Mitochondrial complex II-dependent ADP-stimulated respiration in permeabilized astrocyte-enriched primary brain cultures. Cells were permeabilized and provided the complex II substrate succinate along with ADP and complex I inhibitors. (N=3-7 per group, ANOVA not significant). **(D)** NADH/NAD<sup>+</sup> ratio in cultured astrocyte-enriched primary cells from early post-natal WT vs NDI1 expressing mice. NDI1 expression prevents a significant increase in the NADH/NAD<sup>+</sup> ratio following mitochondrial complex I inhibition with Piericidin A. (N=3 per group, \* indicates one-way ANOVA  $P = 0.0003$  with Tukey's multiple comparisons tests WT Vehicle vs WT 1 $\mu\text{M}$  Piericidin A adjusted  $P = 0.0003$ ). **(E)** RNA sequencing analysis of whole cerebellum tissue. Significantly differentially expressed genes between Cre, NDI1, cKO, and cKO+NDI1 samples were determined with a likelihood ratio test using a threshold adjusted P value of 0.05 and then clustered.

Figure S1:

A.

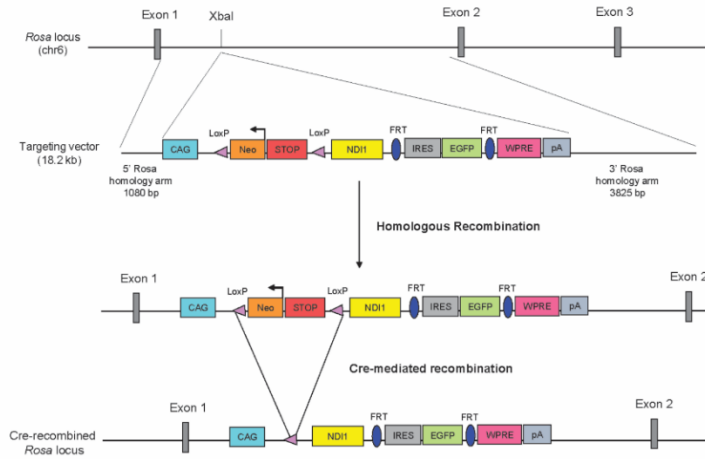

B.

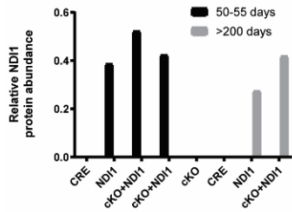

C.

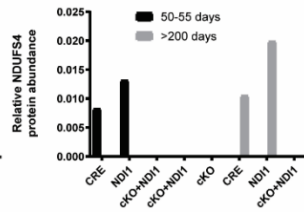

D.

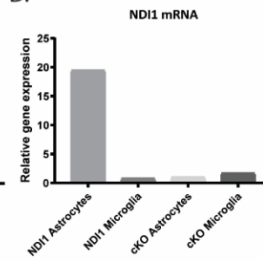

E.

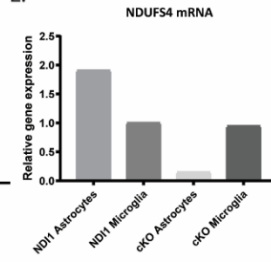

F.

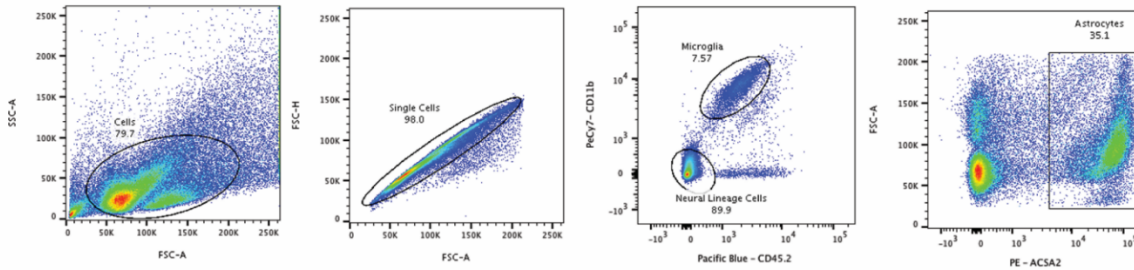

G.

Clusters With Highest Expression of NDUFS4 (top 10 results)

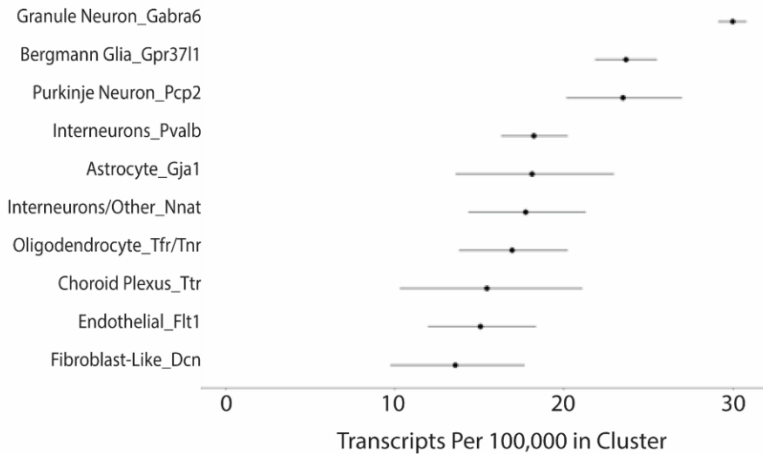

Figure S2:

A.

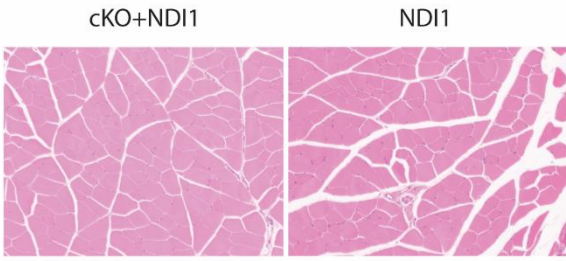

B.

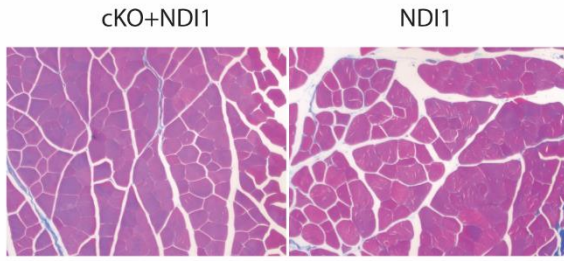

C.

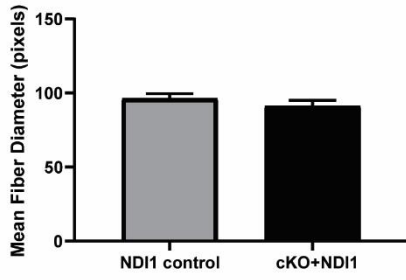

E.

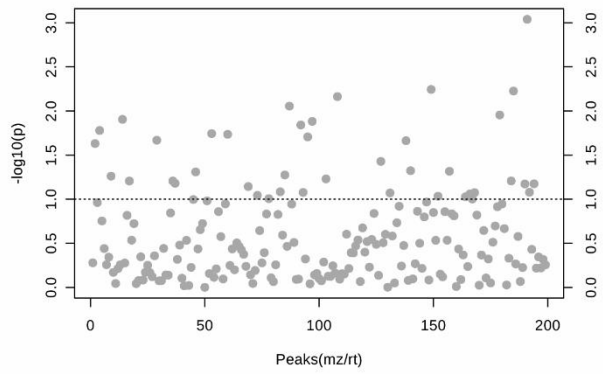

D.

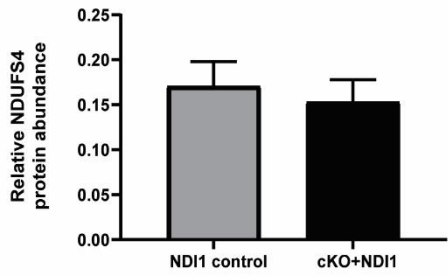

G.

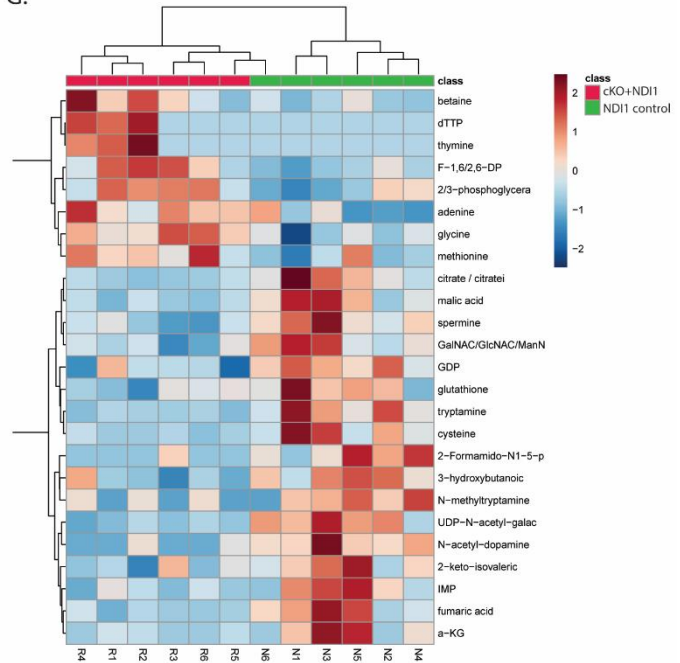

F.

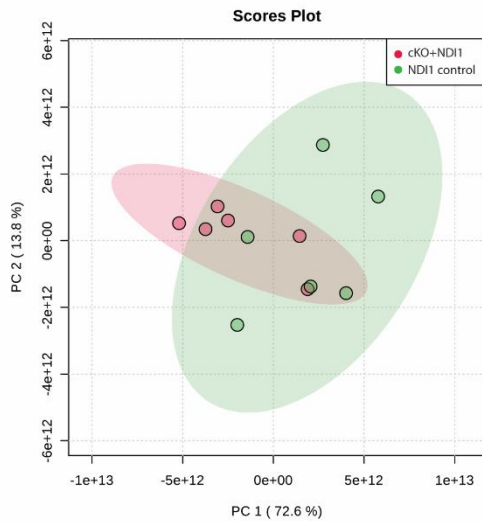

Figure S3:

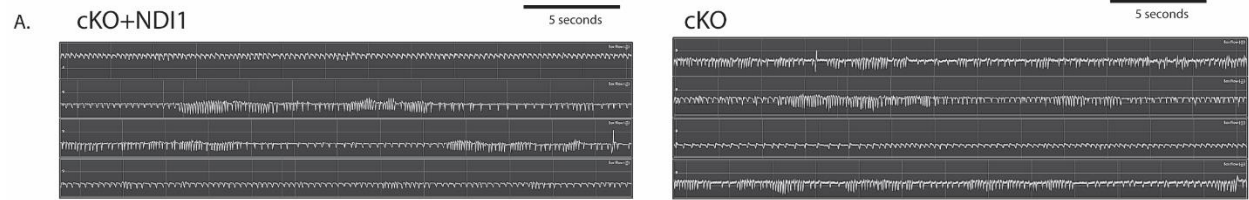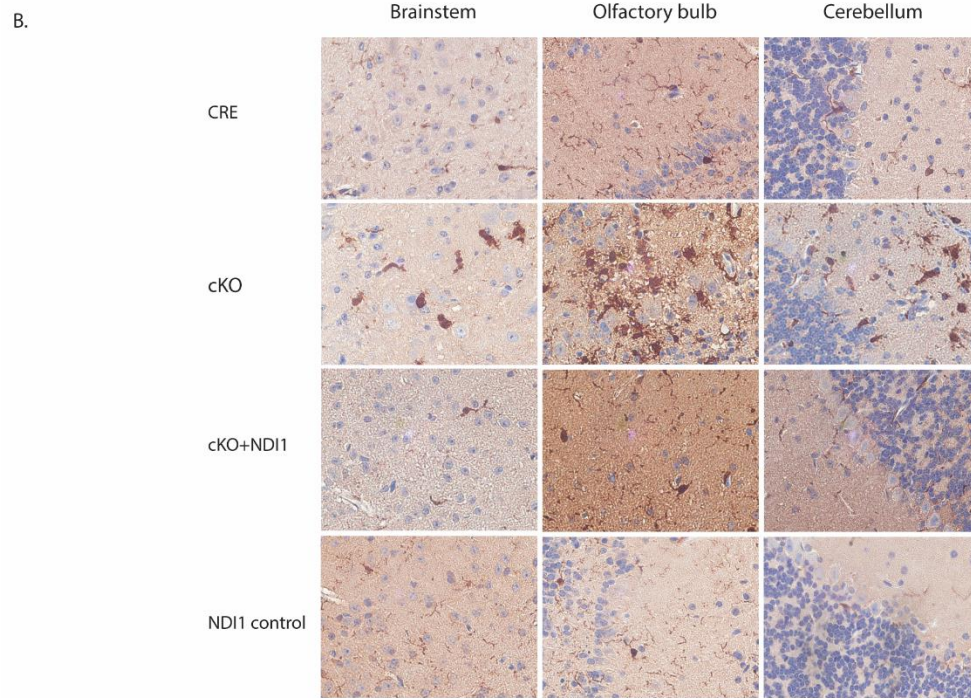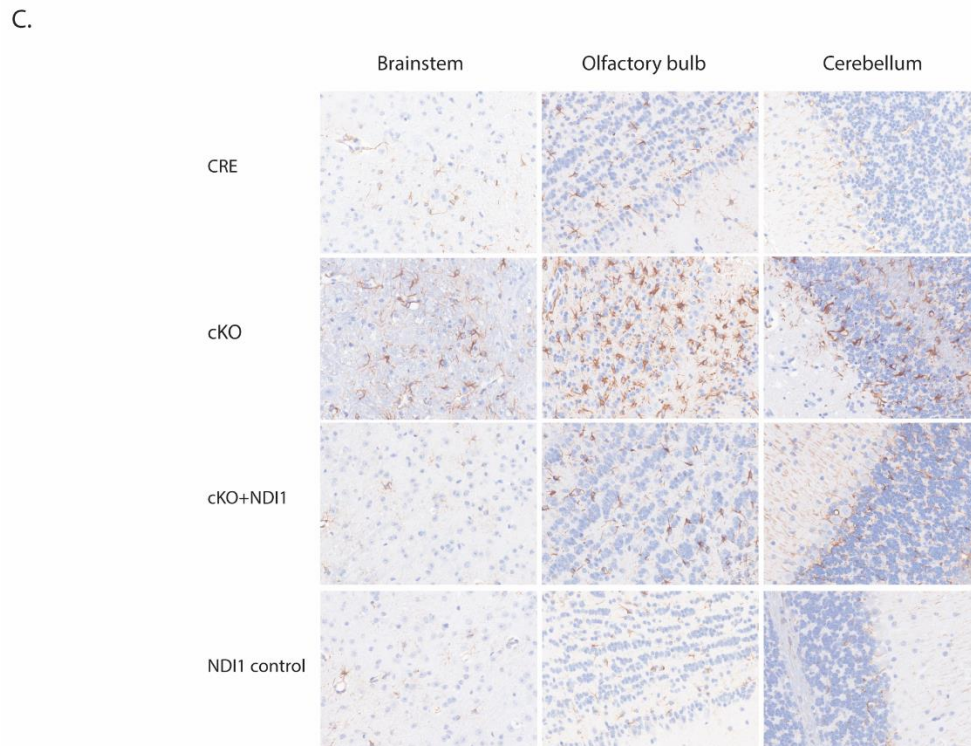



Figure S4:

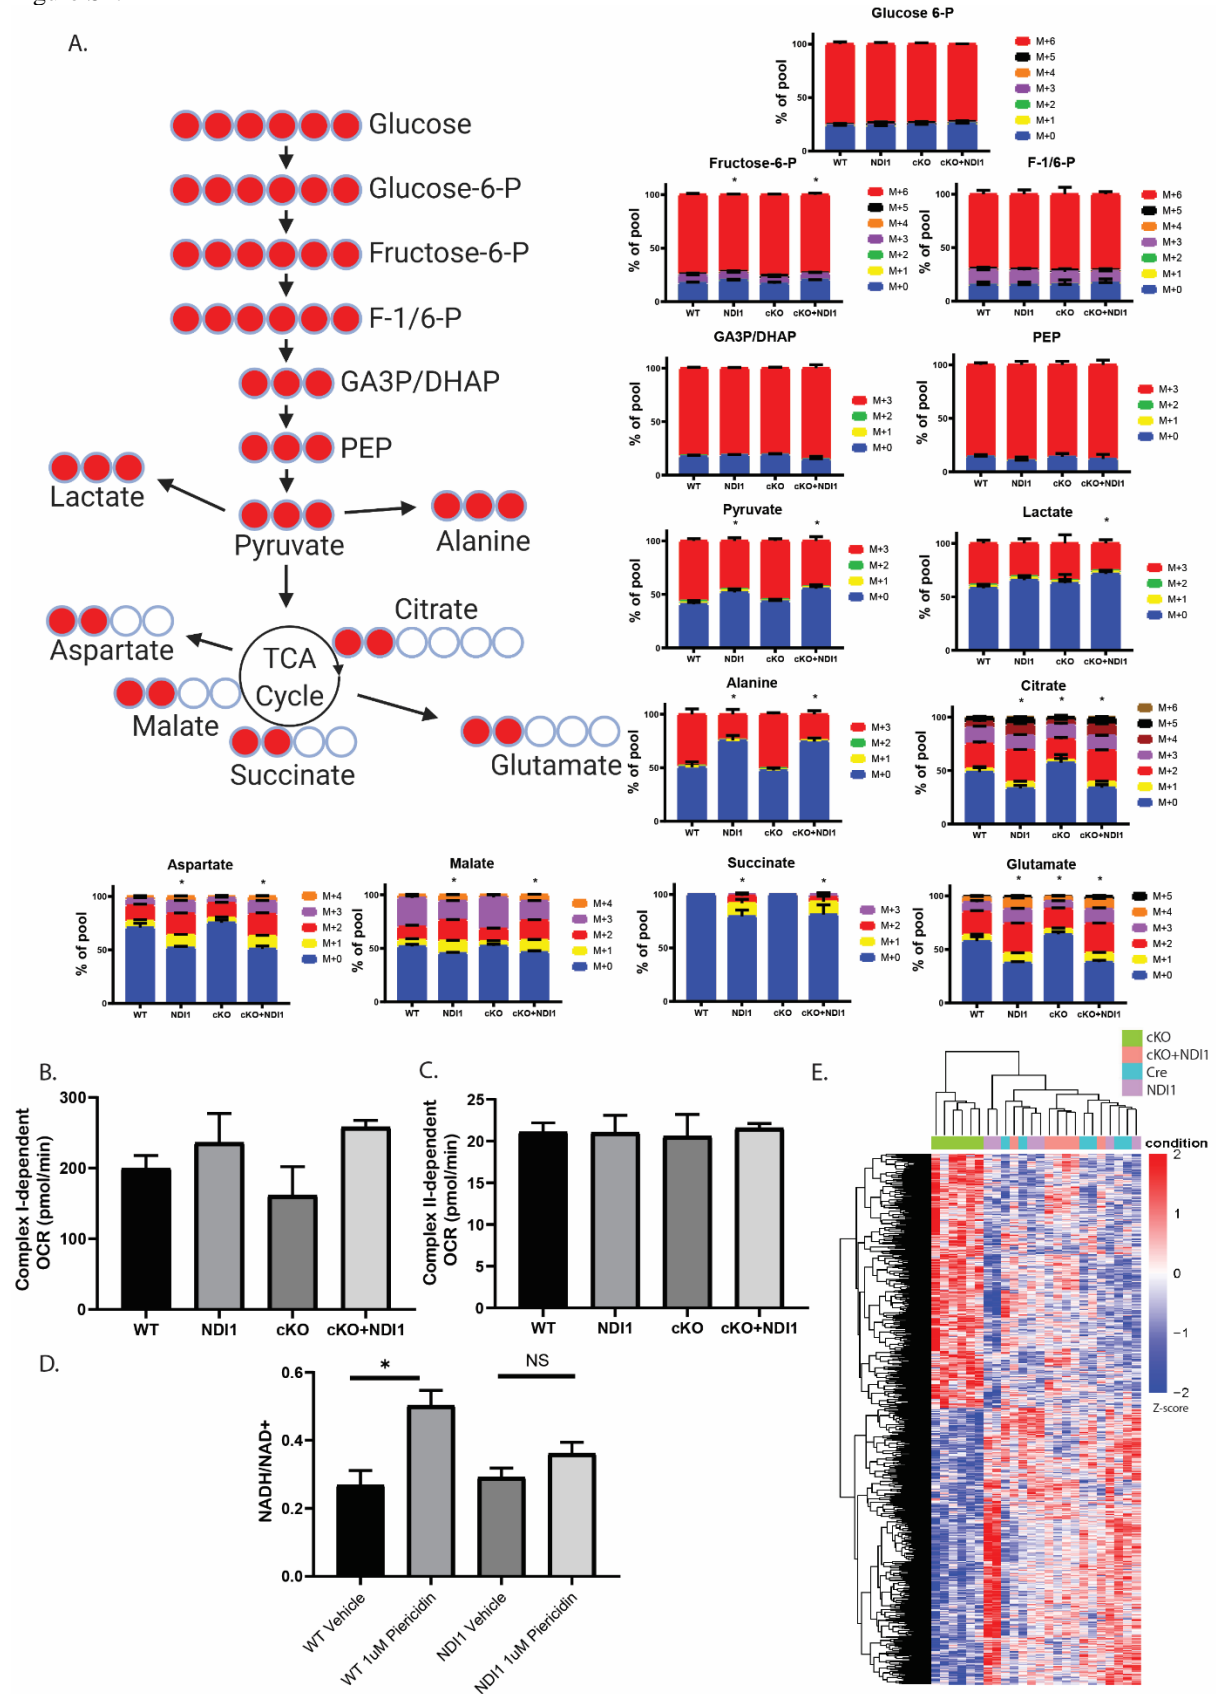

Supplement: NIHMS1604050-supplement-2.pdf [file NIHMS1604050-supplement-2.pdf]
